# Supplementary material for: A novel Mn@MOF-303 as a catalyst for the highly efficient S-formylation of benzyl thiols with CO2
Source: Royal Society of Chemistry journal article supplement (doi:10.1039/d5cc00195a), 2025-01-01

# A novel Mn@MOF-303 as catalyst for the highly efficient *S*- formylation of benzyl thiols with CO<sub>2</sub>

## Supporting Information

### Table of Contents

|                                                            |    |
|------------------------------------------------------------|----|
| General Information.....                                   | 2  |
| Synthesis and Characterization of Mn@MOF-303 .....         | 2  |
| Partial Experimental Content of <i>S</i> -Formylation..... | 3  |
| DFT Calculations .....                                     | 4  |
| Related Figures of Experiment .....                        | 5  |
| NMR Data of the Products (2).....                          | 10 |
| References.....                                            | 11 |
| NMR spectra .....                                          | 12 |

## General Information

Unless otherwise stated, all manipulations were performed under a dry nitrogen or carbon dioxide atmosphere using Schlenk-line techniques. Chemicals used were commercially purchased and used without further purification.  $^1\text{H}$  NMR and  $^{13}\text{C}$  NMR spectra were recorded on a Bruker Avance III HD 400 MHz spectrometer in  $\text{CDCl}_3$  with tetramethylsilane (TMS) as the internal standard. Power X-ray diffraction (PXRD) was tested on an Ultima IV X-ray diffractometer using  $\text{Cu K}\alpha$  radiation in the  $2\theta$  range of  $3\text{-}50^\circ$  ( $\lambda = 0.154178$  nm). Morphologies of samples were characterized by scanning electron microscope (SEM, ZEISS, MERLIN Compact).

## Synthesis and Characterization of Mn@MOF-303

### Preparation of MOF-303<sup>1</sup>

3,5-pyrazoledicarboxylic acid monohydrate (7.50 g, 43.1 mmol) and NaOH (2.60 g, 65 mmol) were dissolved in deionized water (750 mL). The resulting mixture was sonicated for 10 min and heated in a pre-heated oven at  $100^\circ\text{C}$  for 30 min until the solution was clear.  $\text{AlCl}_3 \cdot 6\text{H}_2\text{O}$  (10.4 g, 43.1 mmol) was then added to the solution. Any precipitate was dissolved by vigorous shaking. The hot reaction mixture was placed in a pre-heated oven at  $100^\circ\text{C}$  and left for 15 hours. The white powder formed were collected and washed with water three times per day for two days. The white solid was subsequently washed with methanol for two days, three times per day and dried in air. The product was then activated under dynamic vacuum for 6 hours at room temperature until the pressure was below 100 mbar. After that, the MOF sample was heated at  $100^\circ\text{C}$  for 6 hours and then at  $150^\circ\text{C}$  for another 6 hours to yield activated MOF-303 crystals (3.6 g).

### Preparation of Mn@MOF-303

The suspension of MOF-303 (198 mg, 1.0 mmol) with  $\text{Mn}(\text{OAc})_2 \cdot 4\text{H}_2\text{O}$  (245 mg, 1.0 mmol) in  $\text{CH}_3\text{CN}$  (15 mL) was stirred at  $70^\circ\text{C}$  for 48 hours, giving yellow powder at the bottom of the vial. The metalated Mn@MOF-303 was washed with 10 mL of fresh  $\text{CH}_3\text{CN}$  for 3 times. The resulting Mn@MOF-303 was activated under dynamic vacuum at room temperature for 4 hours, and then at  $120^\circ\text{C}$  for 12 hours.

### Characterization of Mn@MOF-303

The FT-IR of MOF-303 and Mn@MOF-303 were performed (Fig S4). By comparing the FT-IR spectrum of MOF-303 and Mn@MOF-303, we found that the peaks around  $1000\text{ cm}^{-1}$  and  $1500$

cm<sup>-1</sup> are different. This suggested the formation of new bonds (Mn–N coordination bond) by introduction of Mn(OAc)<sub>2</sub> into MOF-303. However, we could not find any relevant literature to determine which is the characteristic peak of the Mn–N bond.

The 77 K nitrogen sorption experiments were conducted by a Micromeritics ASAP 2460 instrument. The sample-loaded tubes soaked in the liquid nitrogen bath during the experiments to maintain a constant temperature environment of 77 K (Figure S1, S5 and S7).

## Partial Experimental Content of *S*-Formylation

### General Procedure of the *S*-Formylation Products

Benzyl thiols (**1**, 1.0 mmol), Cs<sub>2</sub>CO<sub>3</sub> (0.02 mmol), PhSiH<sub>3</sub> (1.5 mmol) and Mn@MOF-303 (20 mg) were introduced in a sealed 10 mL Schlenk tube, 2 mL CH<sub>3</sub>CN was then added. The reaction was placed at atmospheric pressure of CO<sub>2</sub> (1 atm) and stirred for 12 h at 25°C. When the reaction finished, saturated salt solution (10 mL) was then added and extracted with ethyl acetate (3 × 10 mL). The combined organic layers were dried over anhydrous Na<sub>2</sub>SO<sub>4</sub>, and the organic solvent was evaporated on a rotatory evaporator. The crude was purified by flash chromatography on silica gel (PE/EtOAc) to give the corresponding products **2**.

### Optimization of Solvents and Bases for *S*-Formylation

The reaction of benzyl thiol (**1a**, 1.0 mmol) and CO<sub>2</sub> (1 atm) was chosen as a model reaction with Mn@MOF-303 (10 mg) in the presence of PhSiH<sub>3</sub> (1.5 mmol) and Cs<sub>2</sub>CO<sub>3</sub> (0.02 mmol) at 25 °C for 12 h in acetonitrile. Initially, the reaction was carried out in the absence of catalyst, giving the desired product **2a** in 39%, whereas no desired product was observed in the absence of Cs<sub>2</sub>CO<sub>3</sub> (Table S1, entries 1 and 2). This result showed that Cs<sub>2</sub>CO<sub>3</sub> was essential to polarize **1a** and increase its nucleophilic capability on CO<sub>2</sub>. In comparison, Mn(OAc)<sub>2</sub>, MOF-303 and Mn@MOF-303 were used as catalysts to give the desired product **2a** in 50% yield, 48% yield and 85% yield, respectively (Table S1, entries 3-5). The result revealed that both Mn(OAc)<sub>2</sub> and MOF-303 could promote the conversion of the reaction. And the yield of **2a** could reach 85% in the presence of Mn@MOF-303 with Mn element and MOF-303. Maybe the Mn element could activate the substrate (PhSiH<sub>3</sub> or **1a**) and MOF-303 could adsorb CO<sub>2</sub> to participate in the formylation. Solvent and base were important factors in the catalysis. Subsequently, different solvents (THF,

CH<sub>2</sub>Cl<sub>2</sub> and CH<sub>3</sub>OH) and bases (LiO<sup>t</sup>Bu, NaOH and Et<sub>3</sub>N) were investigated (Table S1, entries 6-11). It was confirmed that CH<sub>3</sub>CN and Cs<sub>2</sub>CO<sub>3</sub> is the optimal solvent and base respectively. Thus, the reaction of benzyl thiol (**1a**, 1.0 mmol) and CO<sub>2</sub> (1 atm) with Mn@MOF-303 (10 mg) in the presence of PhSiH<sub>3</sub> (1.5 mmol) and Cs<sub>2</sub>CO<sub>3</sub> (0.02 mmol) at 25 °C for 12 h in acetonitrile was chosen as a model reaction for further optimizing.

**Table S1** Optimization of Reaction Conditions <sup>a</sup>

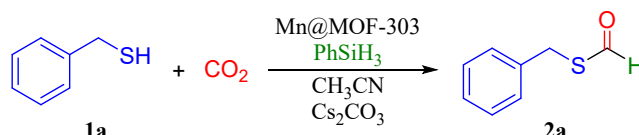

| Entry | Catalyst             | Base                            | Solvent                         | Yield(%) <sup>b</sup> |
|-------|----------------------|---------------------------------|---------------------------------|-----------------------|
| 1     | —                    | Cs <sub>2</sub> CO <sub>3</sub> | CH <sub>3</sub> CN              | 39                    |
| 2     | Mn@MOF-303           | —                               | CH <sub>3</sub> CN              | Trace                 |
| 3     | Mn(OAc) <sub>2</sub> | Cs <sub>2</sub> CO <sub>3</sub> | CH <sub>3</sub> CN              | 50                    |
| 4     | MOF-303              | Cs <sub>2</sub> CO <sub>3</sub> | CH <sub>3</sub> CN              | 48                    |
| 5     | Mn@MOF-303           | Cs <sub>2</sub> CO <sub>3</sub> | CH <sub>3</sub> CN              | 85                    |
| 6     | Mn@MOF-303           | Cs <sub>2</sub> CO <sub>3</sub> | THF                             | 63                    |
| 7     | Mn@MOF-303           | Cs <sub>2</sub> CO <sub>3</sub> | CH <sub>2</sub> Cl <sub>2</sub> | 31                    |
| 8     | Mn@MOF-303           | Cs <sub>2</sub> CO <sub>3</sub> | CH <sub>3</sub> OH              | 20                    |
| 9     | Mn@MOF-303           | LiO <sup>t</sup> Bu             | CH <sub>3</sub> CN              | 49                    |
| 10    | Mn@MOF-303           | NaOH                            | CH <sub>3</sub> CN              | 11                    |
| 11    | Mn@MOF-303           | Et <sub>3</sub> N               | CH <sub>3</sub> CN              | trace                 |

<sup>a</sup> Reaction conditions: **1a** (1.0 mmol), CO<sub>2</sub> (1 atm), PhSiH<sub>3</sub> (1.5 mmol), Cs<sub>2</sub>CO<sub>3</sub> (0.02 mmol), catalyst (20 mg), CH<sub>3</sub>CN (2 mL) at 25 °C. <sup>b</sup> Isolated yield.

### Control Experiment of Mn@MOF-303 with Phenylsilane

PhSiH<sub>3</sub> (3 mmol) and Mn@MOF-303 (40 mg) were introduced in a sealed 10 mL Schlenk tube, 3 mL CH<sub>3</sub>CN was then added. The reaction was stirred for 12 h at 25°C. When the reaction finished, the “reacted” catalyst was filtered and washed with CH<sub>3</sub>CN (3 × 5 mL). The white solid was dried under vacuum at room temperature for 1 hour. The FT-IR of the “reacted” catalyst was investigated (shown in Fig. S3). It was found that no clear characteristic peaks appeared in the spectrum compared with the spectrum of Mn@MOF-303. It is possible that the bonds in intermediate **I** are particularly weak or the intermediate **I** is too reactive to be stable.

### DFT Calculations

DFT calculations were then performed to optimize the geometry and calculate the Gibbs free

energy of the reaction on the Gaussian 16 program<sup>2</sup> with the B3LYP functional<sup>3</sup>. The geometry optimization and transit state search were performed using the def2-svp basis set for all atoms. Single point energies were calculated at the B3LYP/def2tzvp level on optimized geometries.<sup>4</sup>

### Related Figures of Experiment

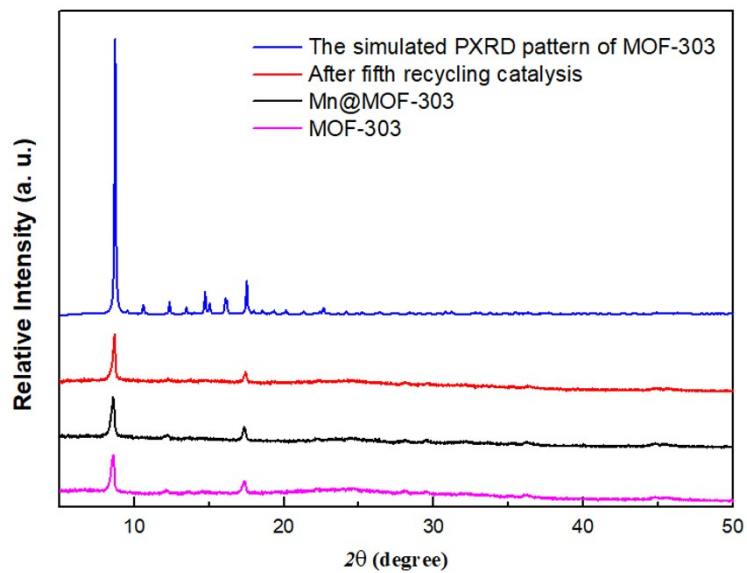

**Fig. S1** PXRD patterns of Mn@MOF-303 and MOF-303.

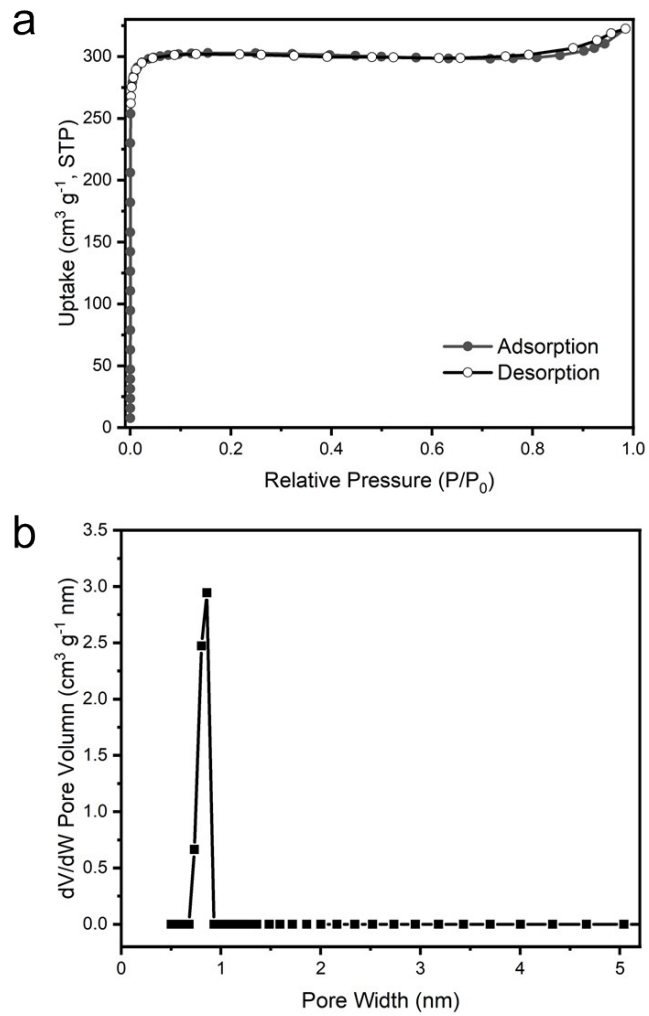

**Fig. S2** The N<sub>2</sub> sorption isotherms of MOF-303 (a) and the pore width distribution (b) calculated by DFT method.

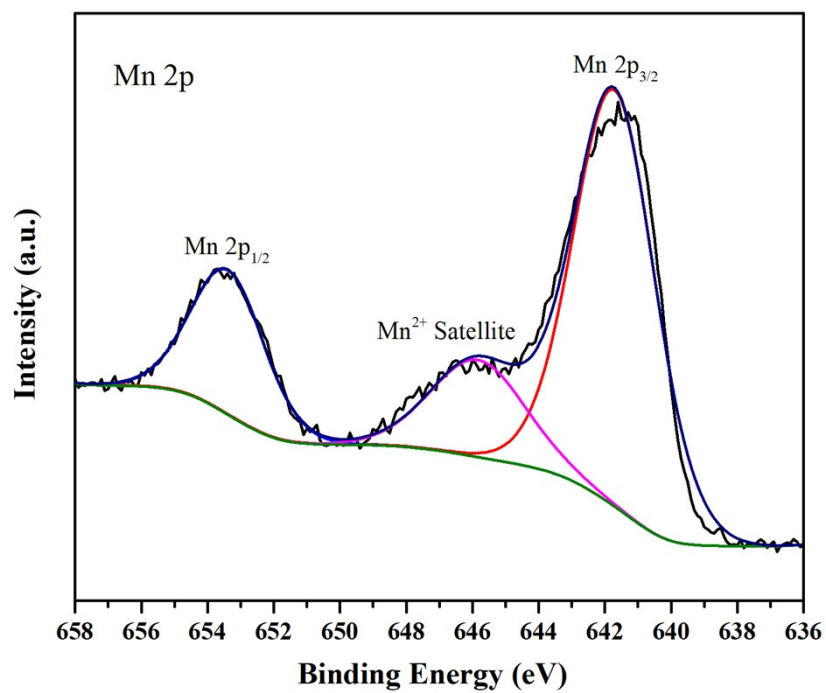

**Fig. S3** The Mn XPS spectrum of Mn@MOF-303.

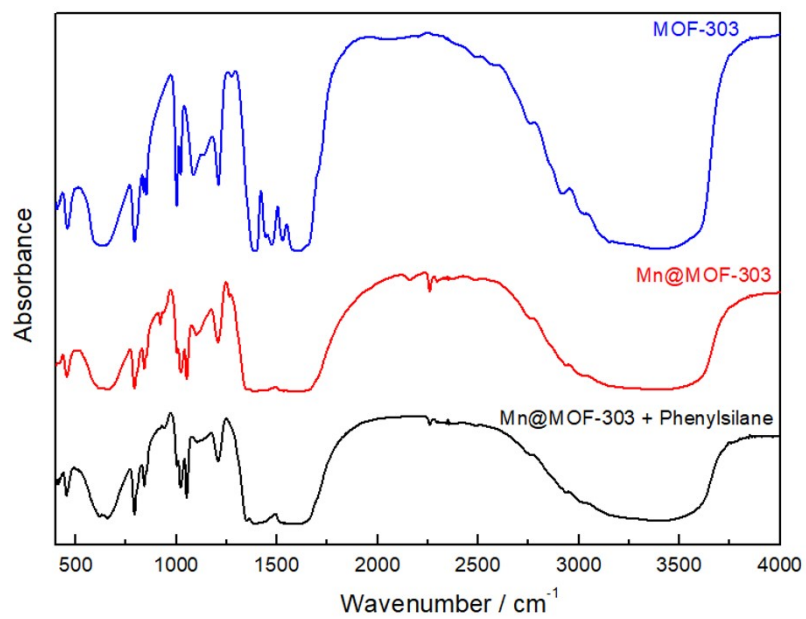

**Fig. S4** The FT-IR spectrum of MOF-303, Mn@MOF-303 and “reacted” Mn@MOF-303.

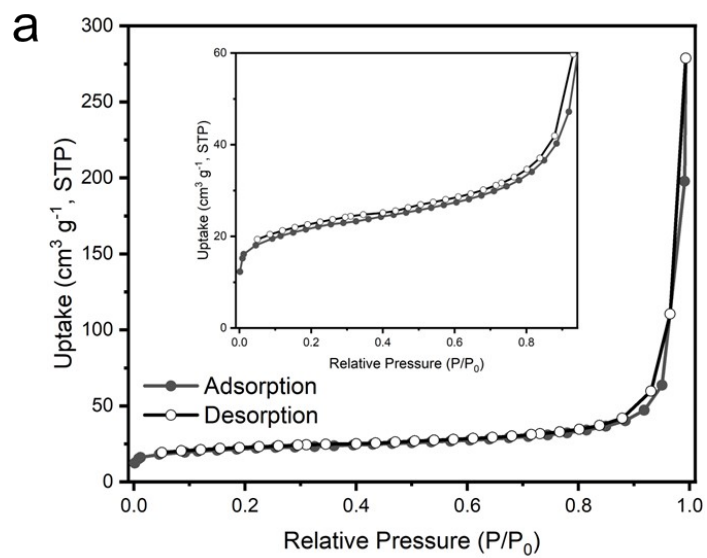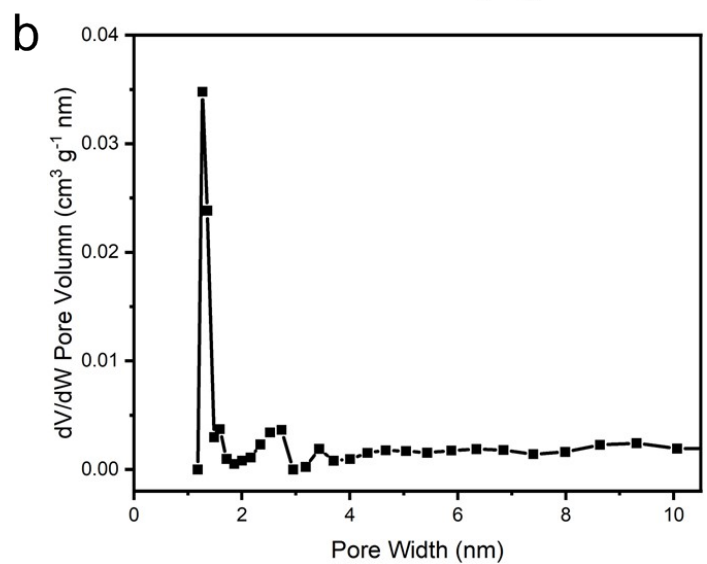

**Fig. S5** The  $N_2$  sorption isotherms of Mn@MOF-303 (a) and the pore width distribution (b) calculated by DFT method.

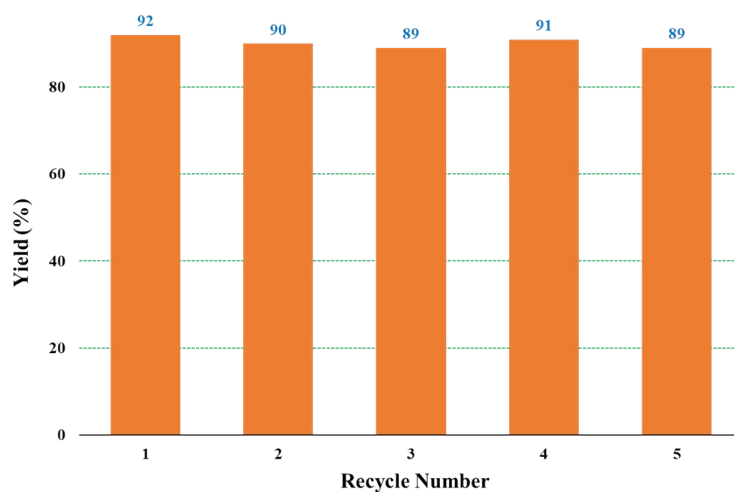

**Fig. S6** Recycling experiments on the S-formylation of benzyl thiol (**1a**) and  $\text{CO}_2$ .



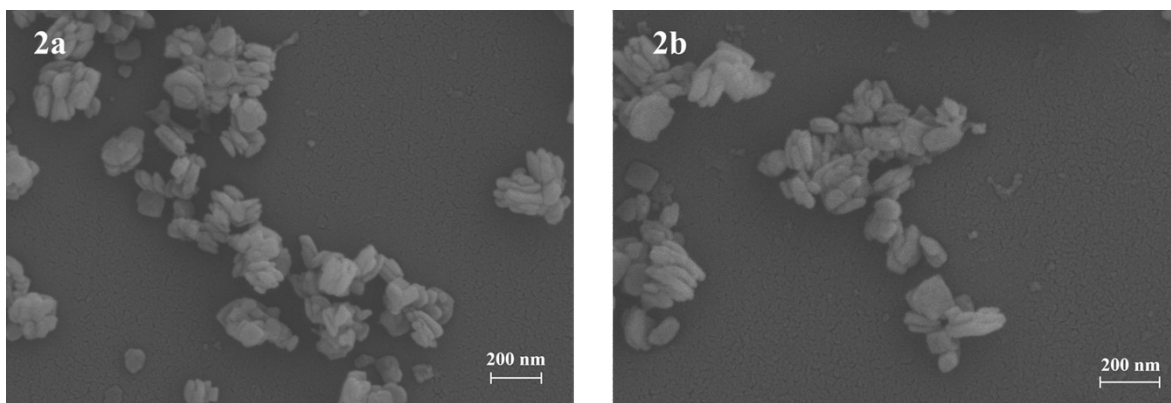

**Fig. S7** SEM images of the uncirculated Mn@MOF-303 (**2a**) and recycled Mn@MOF-303 (**2b**).

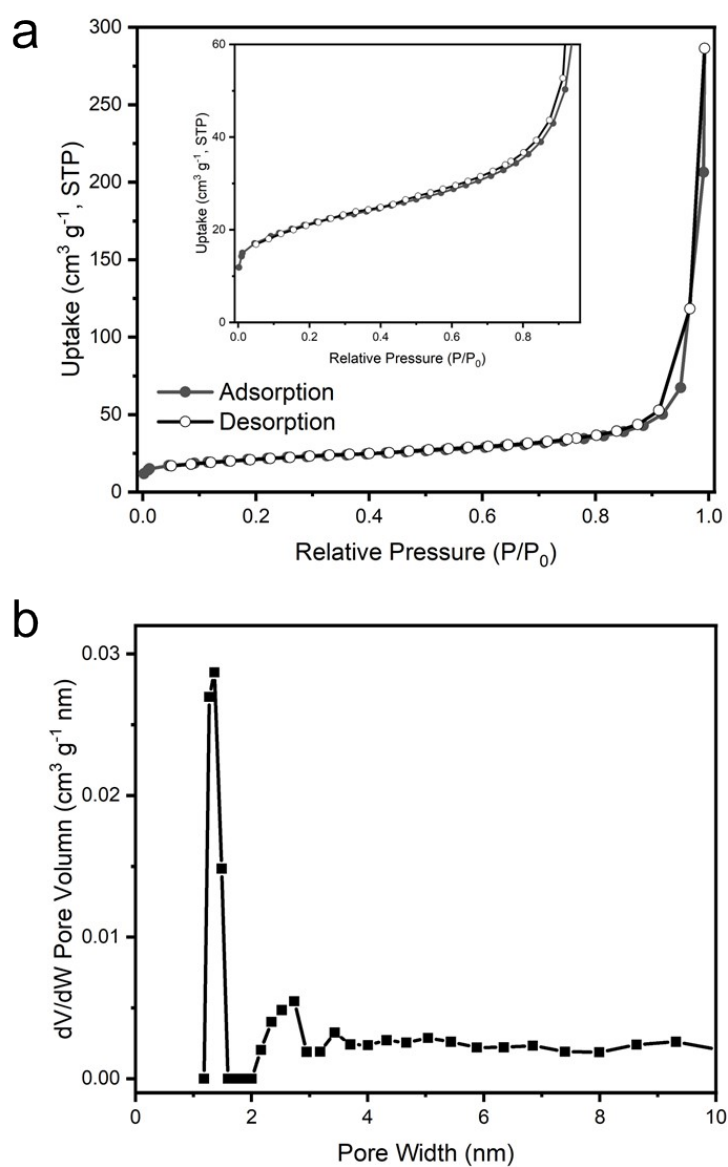

**Fig. S8** The  $\text{N}_2$  sorption isotherms of recycled Mn@MOF-303 (a) and the pore width distribution (b) calculated by DFT method.

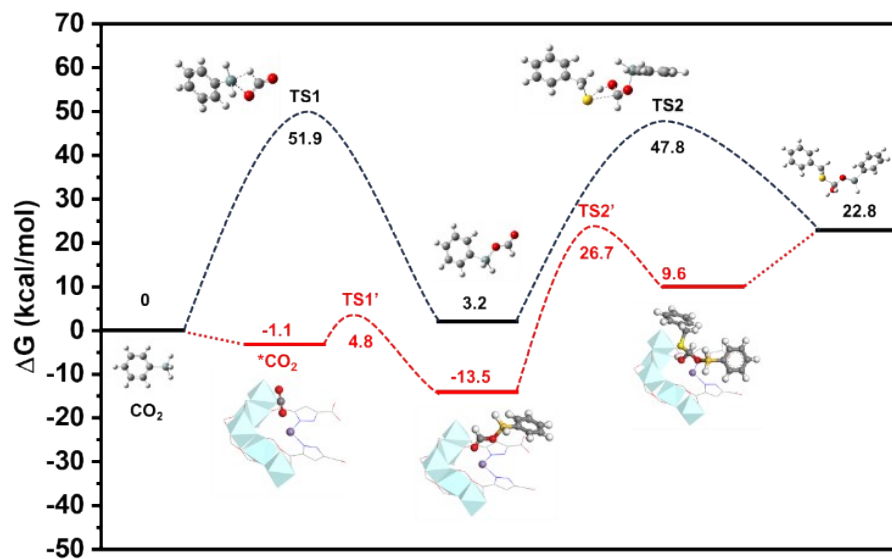

**Fig. S9** Gibbs free energy diagram of CO<sub>2</sub> hydrosilylation and PhCH<sub>2</sub>SH nucleophilic addition. (a) The energy data (in red) is the energy of each intermediate state with Mn@MOF-303 as the catalyst. (b) The energy data (in blue) is the calculated Gibbs free energy of CO<sub>2</sub> intermediate without MOF-303.

## NMR Data of the Products (2)

### **S-benzyl methanethioate (2a)**<sup>5</sup>

<sup>1</sup>H NMR (500 MHz, CDCl<sub>3</sub>) δ 10.16 (s, 1H), 7.33-7.24 (m, 5H), 4.22 (s, 2H). <sup>13</sup>C NMR (126 MHz, CDCl<sub>3</sub>) δ 186.72 (s), 136.77 (s), 128.81 (d, *J* = 14.4 Hz), 127.53 (s), 30.78 (s).

### **S-(4-methylbenzyl) methanethioate (2b)**<sup>5</sup>

<sup>1</sup>H NMR (500 MHz, CDCl<sub>3</sub>) δ 10.07 (s, 1H), 7.11 (d, *J* = 7.9 Hz, 2H), 7.04 (d, *J* = 7.8 Hz, 2H), 4.11 (s, 2H), 2.24 (s, 3H). <sup>13</sup>C NMR (126 MHz, CDCl<sub>3</sub>) δ 136.27 (s), 132.65 (s), 128.40 (s), 127.74 (s), 29.52 (s), 20.07 (s).

### **S-(4-(tert-butyl)benzyl) methanethioate (2c)**<sup>5</sup>

<sup>1</sup>H NMR (500 MHz, CDCl<sub>3</sub>) δ 10.05 (s, 1H), 7.24 (d, *J* = 7.4 Hz, 2H), 7.14 (d, *J* = 7.2 Hz, 2H), 4.10 (s, 2H), 1.21 (s, 12H). <sup>13</sup>C NMR (126 MHz, CDCl<sub>3</sub>) δ 186.94 (s), 150.56 (s), 133.67 (s), 128.61 (s), 125.73 (s), 34.57 (s), 31.36 (s), 30.46 (s).

### **S-(4-methoxybenzyl) methanethioate (2d)**<sup>5</sup>

<sup>1</sup>H NMR (500 MHz, CDCl<sub>3</sub>) δ 10.17 (s, 1H), 7.25 (d, *J* = 8.7 Hz, 2H), 6.87 (d, *J* = 8.7 Hz, 2H), 4.20 (s, 2H), 3.81 (s, 3H). <sup>13</sup>C NMR (126 MHz, CDCl<sub>3</sub>) δ 186.97 (s), 159.02 (s), 130.06 (s), 128.76 (s), 114.17 (s), 55.28 (s), 30.36 (s).

### **S-(4-chlorobenzyl) methanethioate (2e)**<sup>5</sup>

<sup>1</sup>H NMR (500 MHz, CDCl<sub>3</sub>) δ 10.18 (d, *J* = 5.8 Hz, 1H), 7.30 (d, *J* = 8.4 Hz, 2H), 7.27-7.22 (m, 2H), 4.19 (s, 2H). <sup>13</sup>C NMR (126 MHz, CDCl<sub>3</sub>) δ 186.37 (s), 135.47 (s), 133.40 (s), 130.24 (s), 128.89 (s), 30.05 (s).

### **S-(2-methylbenzyl) methanethioate (2f)**<sup>5</sup>

<sup>1</sup>H NMR (500 MHz, CDCl<sub>3</sub>) δ 10.20 (s, 1H), 7.26 (t, *J* = 7.5 Hz, 1H), 7.22-7.09 (m, 3H), 4.24 (s, 2H), 2.39 (s, 3H). <sup>13</sup>C NMR (126 MHz, CDCl<sub>3</sub>) δ 186.87 (s), 138.52 (s), 136.71 (s), 129.63 (s), 128.71 (s), 128.36 (s), 125.96 (s), 30.76 (s), 21.39 (s).

### **S-(2-chlorobenzyl) methanethioate (2g)**<sup>5</sup>

<sup>1</sup>H NMR (500 MHz, CDCl<sub>3</sub>) δ 10.18 (s, 1H), 7.47 (dd, *J* = 5.6, 3.7 Hz, 1H), 7.40 (dd, *J* = 5.5, 3.8 Hz, 1H), 7.24 (dd, *J* = 5.8, 3.5 Hz, 2H), 4.36 (s, 2H). <sup>13</sup>C NMR (126 MHz, CDCl<sub>3</sub>) δ 186.57 (s), 134.67 (s), 134.15 (s), 131.20 (s), 129.64 (s), 129.08 (s), 127.12 (s), 28.70 (s).

### **S-(3-methylbenzyl) methanethioate (2h)**<sup>5</sup>

<sup>1</sup>H NMR (500 MHz, CDCl<sub>3</sub>) δ 10.17 (s, 1H), 7.36 (s, 1H), 7.26-7.23 (m, 3H), 4.30 (s, 2H), 2.41 (s,

3H).  $^{13}\text{C}$  NMR (126 MHz,  $\text{CDCl}_3$ )  $\delta$  186.87 (s), 138.52 (s), 136.71 (s), 129.63 (s), 128.71 (s), 128.36 (s), 125.96 (s), 30.76 (s), 21.39 (s).

**S-(2,4,6-trimethoxybenzyl) methanethioate (2i)** <sup>5</sup>

$^1\text{H}$  NMR (500 MHz,  $\text{CDCl}_3$ )  $\delta$  10.33 (s, 1H), 6.13 (s, 2H), 4.32 (s, 2H), 3.84 (s, 6H), 3.83 (s, 3H).

$^{13}\text{C}$  NMR (126 MHz,  $\text{CDCl}_3$ )  $\delta$  190.60 (s), 161.04 (s), 159.00 (s), 105.00 (s), 90.52 (s), 55.79 (s), 55.37 (s), 20.44 (s).

**References**

- [1] H. Wang, Z. Shi, J. Yang, T. Sun, B. Rungtaweevoranit, H. Lyu, Y.B. Zhang, O.M. Yaghi, Docking of CuI and AgI in metal-organic frameworks for adsorption and separation of xenon. *Angew. Chem. Int. Ed.*, 2021, **60**, 3417-3421.
- [2] M.J. Frisch, G.W. Trucks, H.B. Schlegel, G.E. Scuseria, M.A. Robb, J.R. Cheeseman, G. Scalmani, V. Barone, G.A. Petersson, H. Nakatsuji, X. Li, M. Caricato, A.V. Marenich, J. Bloino, B.G. Janesko, R. Gomperts, B. Mennucci, H.P. Hratchian, J.V. Ortiz, A.F. Izmaylov, J.L. Sonnenberg, F. Ding, F. Lipparini, F. Egidi, J. Goings, B. Peng, A. Petrone, T. Henderson, D. Ranasinghe, V.G. Zakrzewski, J. Gao, N. Rega, G. Zheng, W. Liang, M. Hada, M. Ehara, K. Toyota, R. Fukuda, J. Hasegawa, M. Ishida, T. Nakajima, Y. Honda, O. Kitao, H. Nakai, T. Vreven, K. Throssell, J.A. Montgomery Jr., J.E. Peralta, F. Ogliaro, M.J. Bearpark, J.J. Heyd, E.N. Brothers, K.N. Kudin, V.N. Staroverov, T.A. Keith, R. Kobayashi, J. Normand, K. Raghavachari, A.P. Rendell, J.C. Burant, S.S. Iyengar, J. Tomasi, M. Cossi, J.M. Millam, M. Klene, C. Adamo, R. Cammi, J.W. Ochterski, R.L. Martin, K. Morokuma, O. Farkas, J.B. Foresman, D.J. Fox. Gaussian 16 Revision. C.01, Wallingford, CT, 2016.
- [3] A.D. Becke, Density-functional exchange-energy approximation with correct asymptotic behavior, *Phys. Rev. A.*, 1988, **38**, 3098-3100.
- [4] F. Weigend, R. Ahlrichs, Balanced basis sets of split valence, triple zeta valence and quadruple zeta valence quality for H to Rn: Design and assessment of accuracy, *Phys. Chem. Chem. Phys.*, 2005, **7**, 3297-3305.
- [5] S. Maji, A. Das, M.M. Bhatt, S.K. Mandal, Metal-free organocatalytic S-formylation of thiols using  $\text{CO}_2$ . *Nat. Catal.*, 2024, **7**, 375-385.

# NMR spectra

## S-benzyl methanethioate (2a)

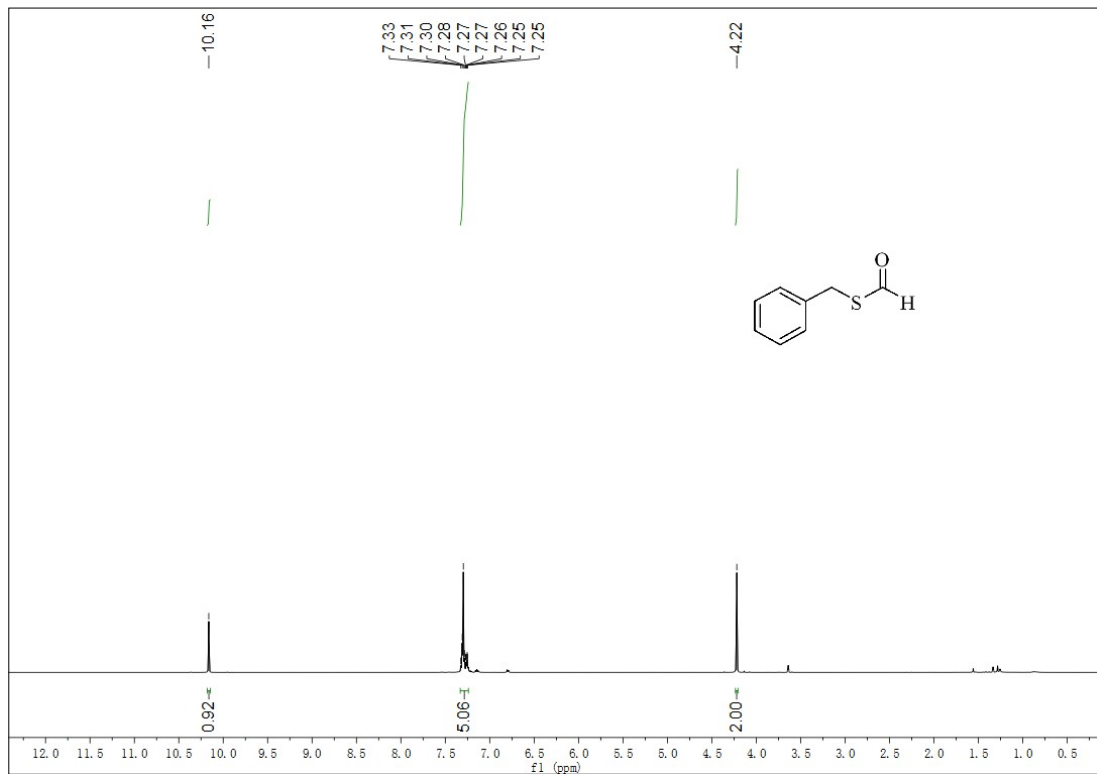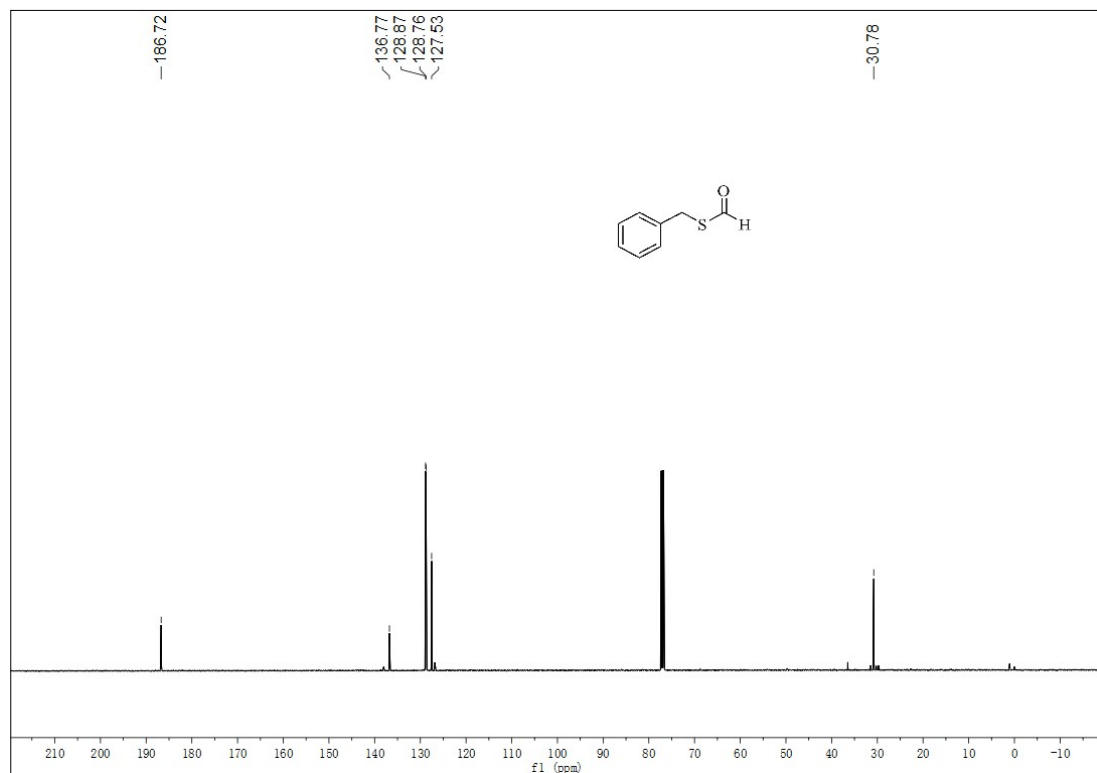

**S-(4-methylbenzyl) methanethioate (2b)**

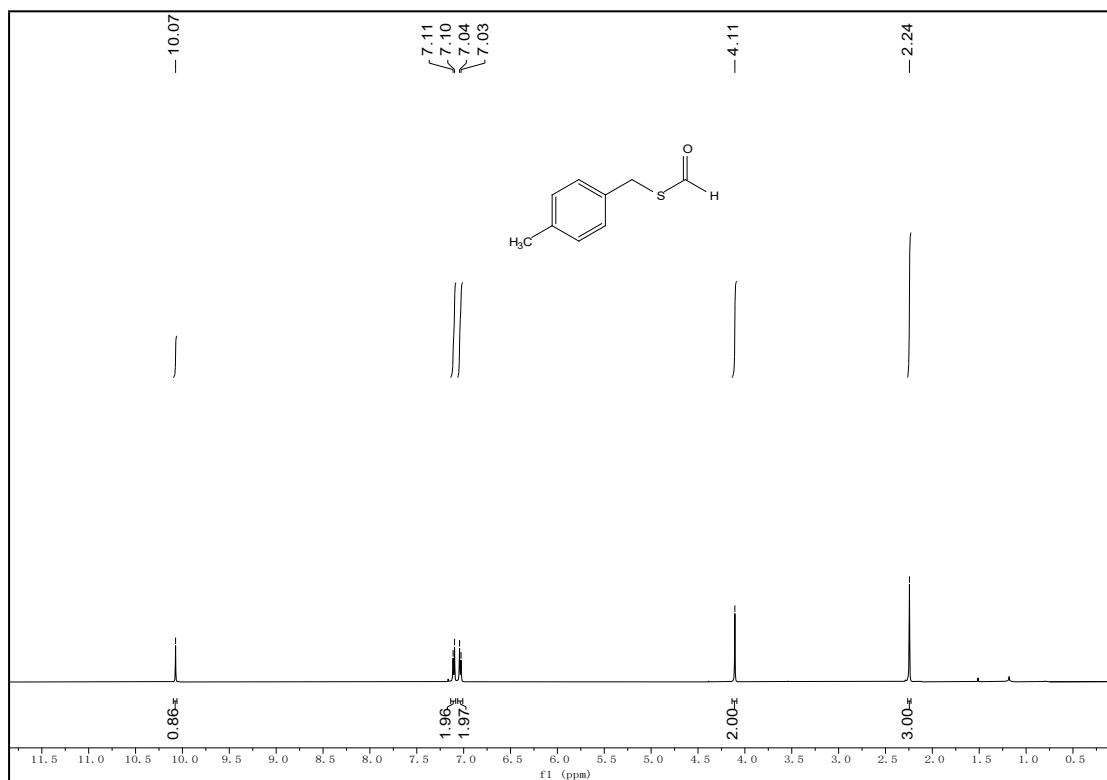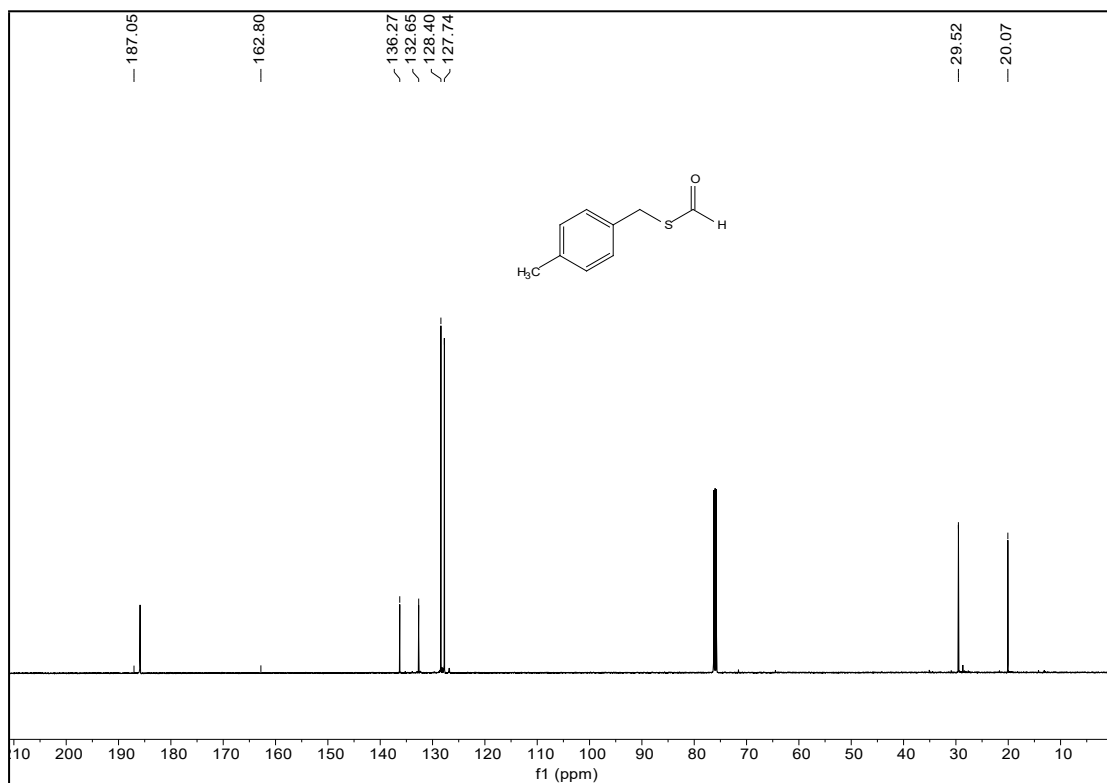

**S-(4-(tert-butyl)benzyl) methanethioate (2c)**

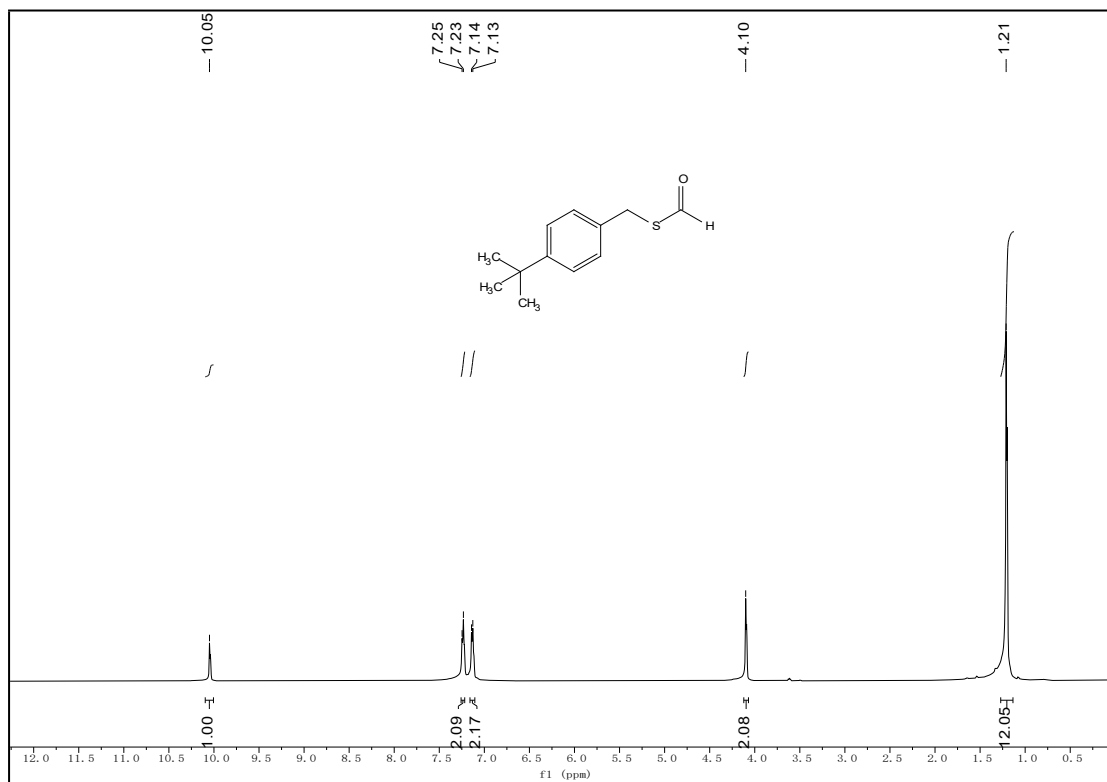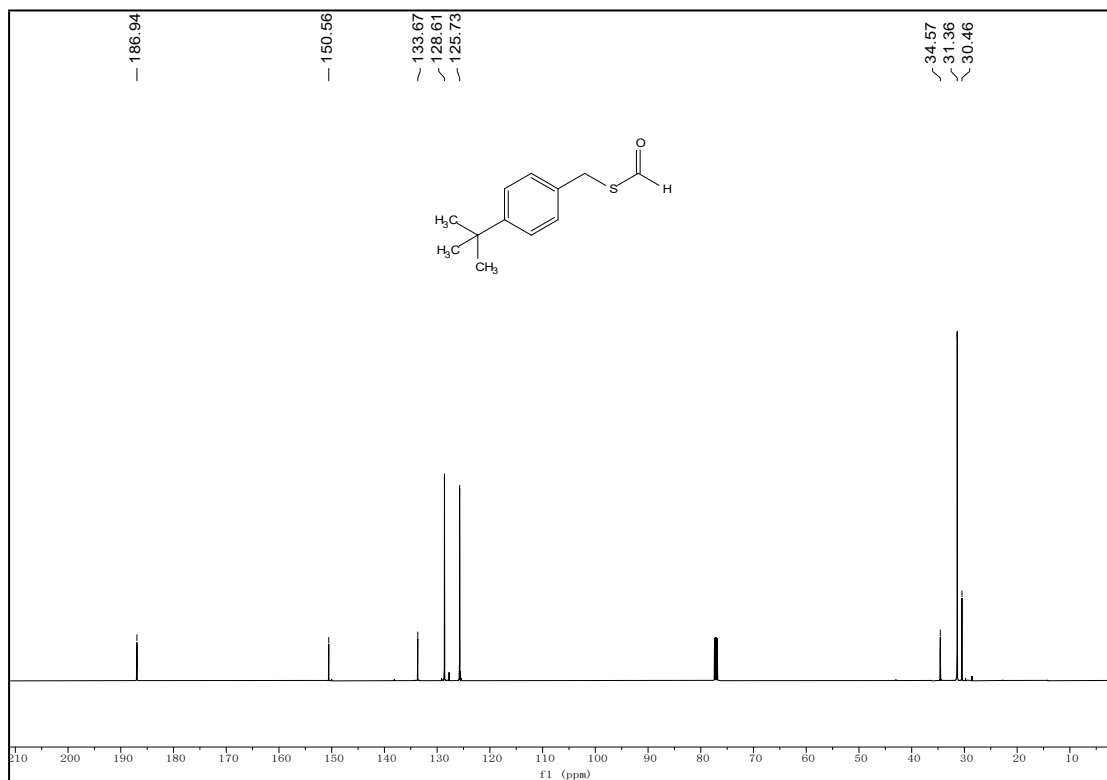

**S-(4-methoxybenzyl) methanethioate (2d)**

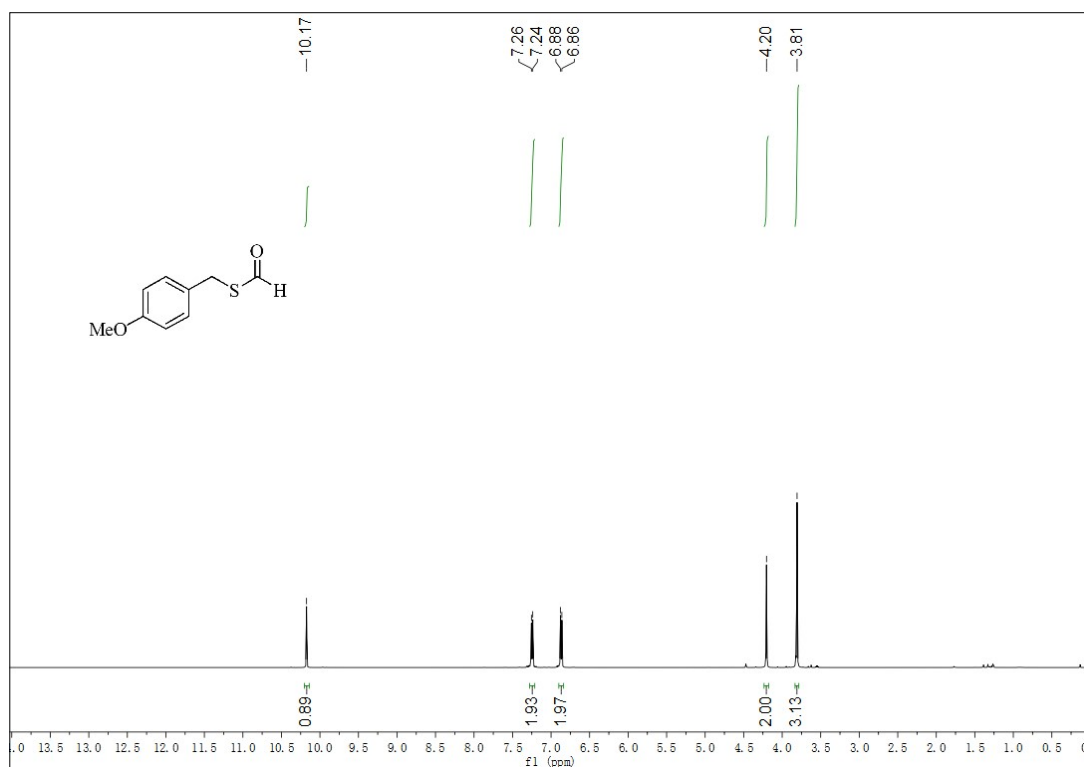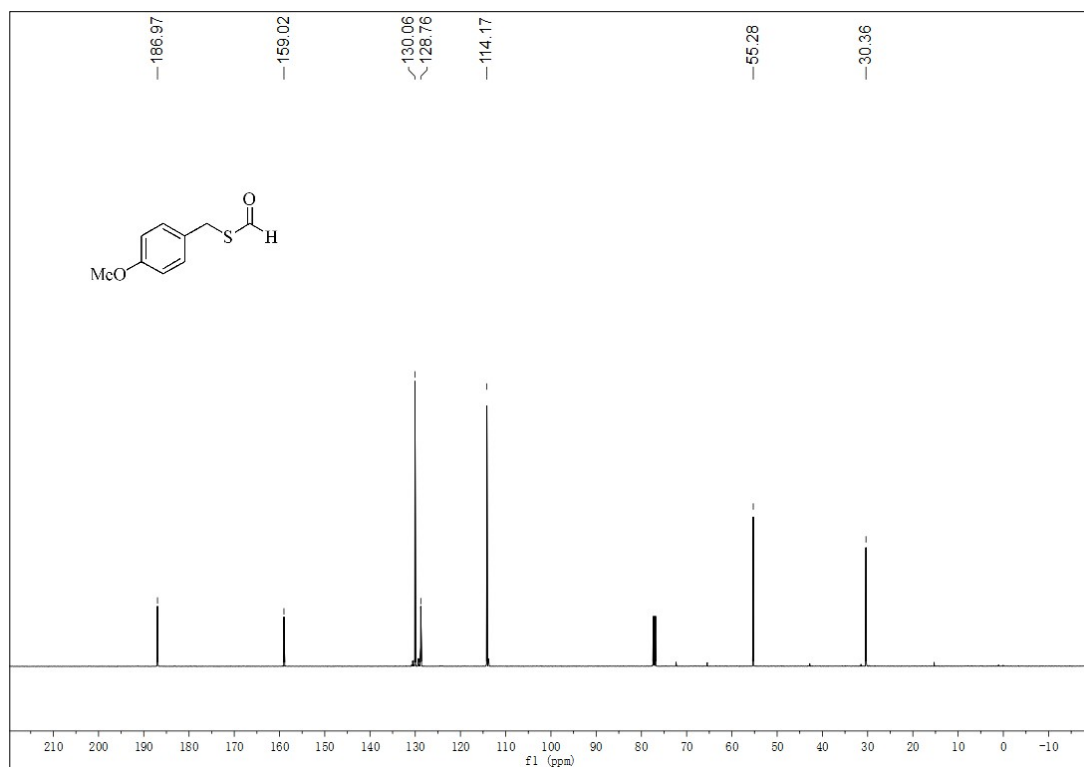



**S-(4-chlorobenzyl) methanethioate (2e)**

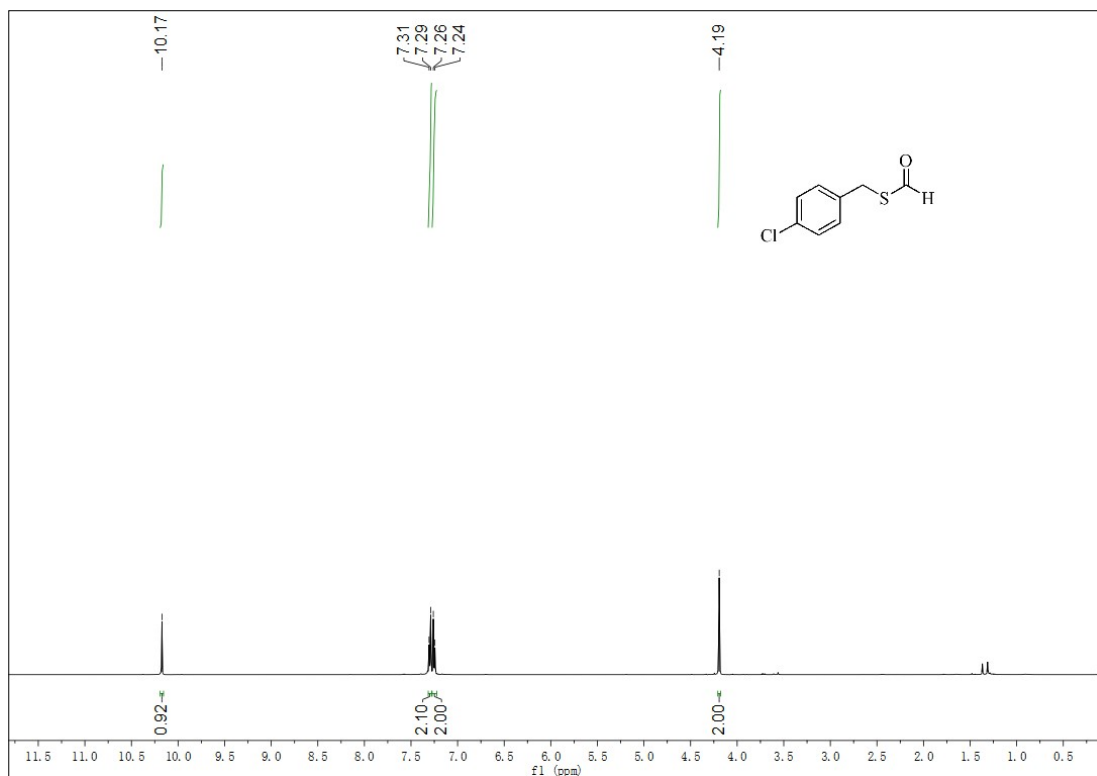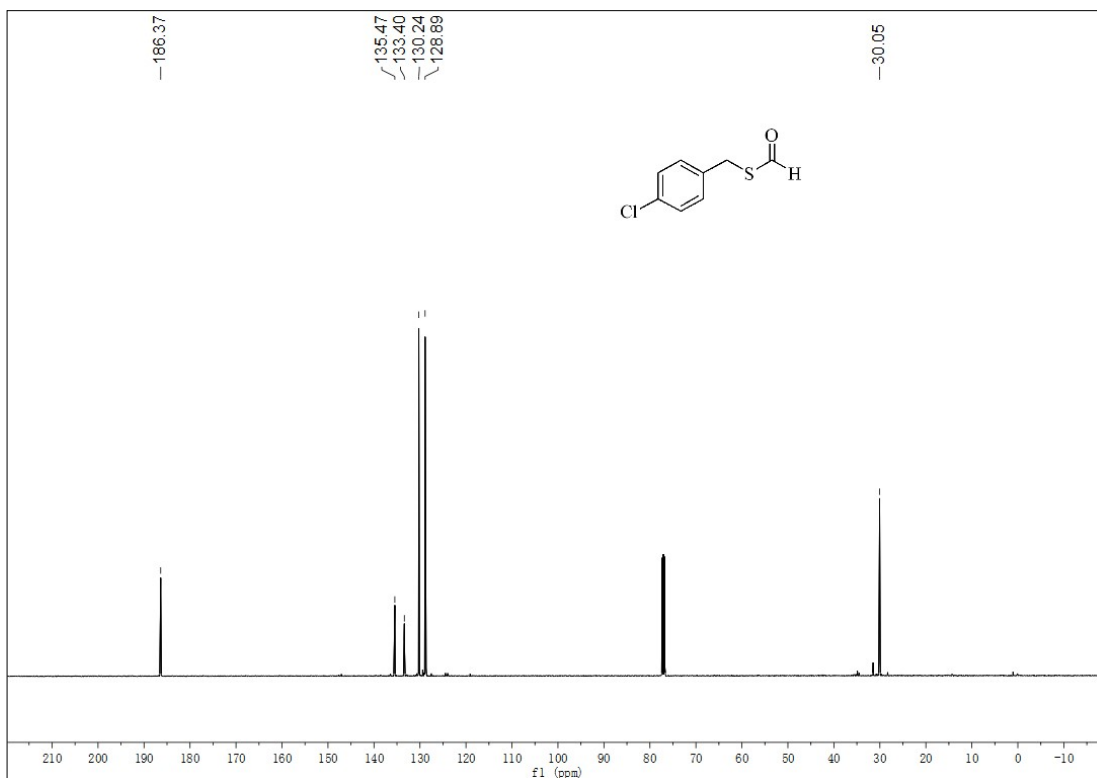

**S-(2-methylbenzyl) methanethioate (2f)**

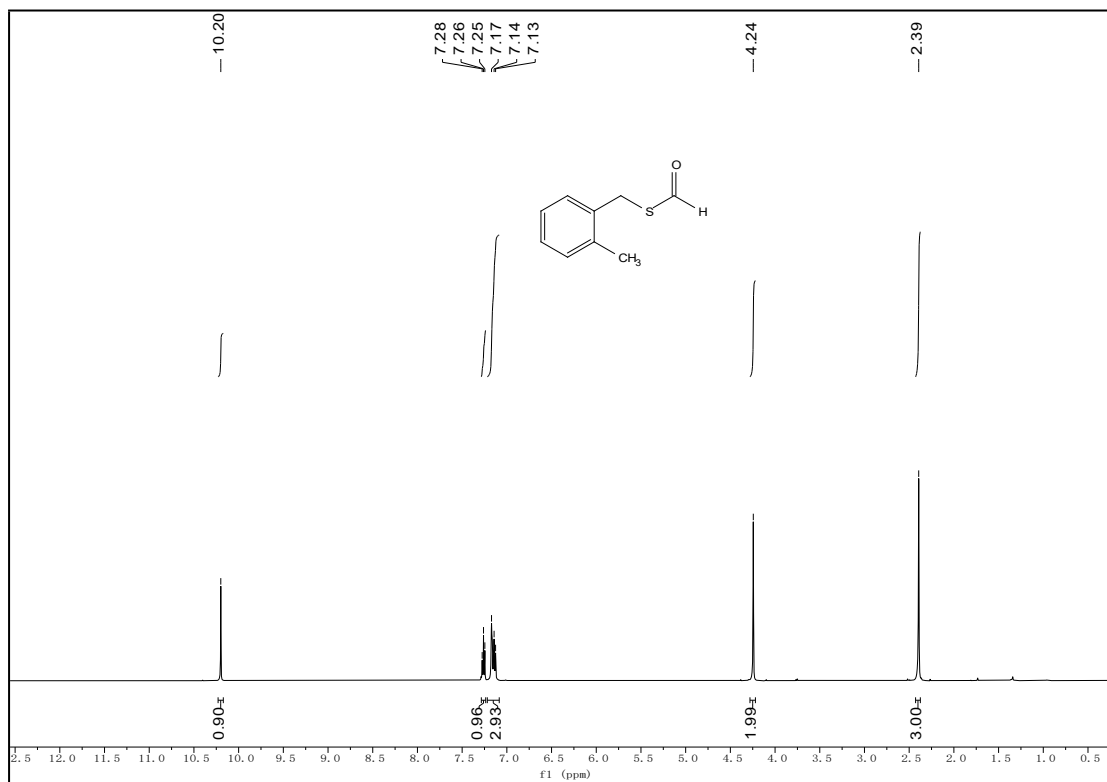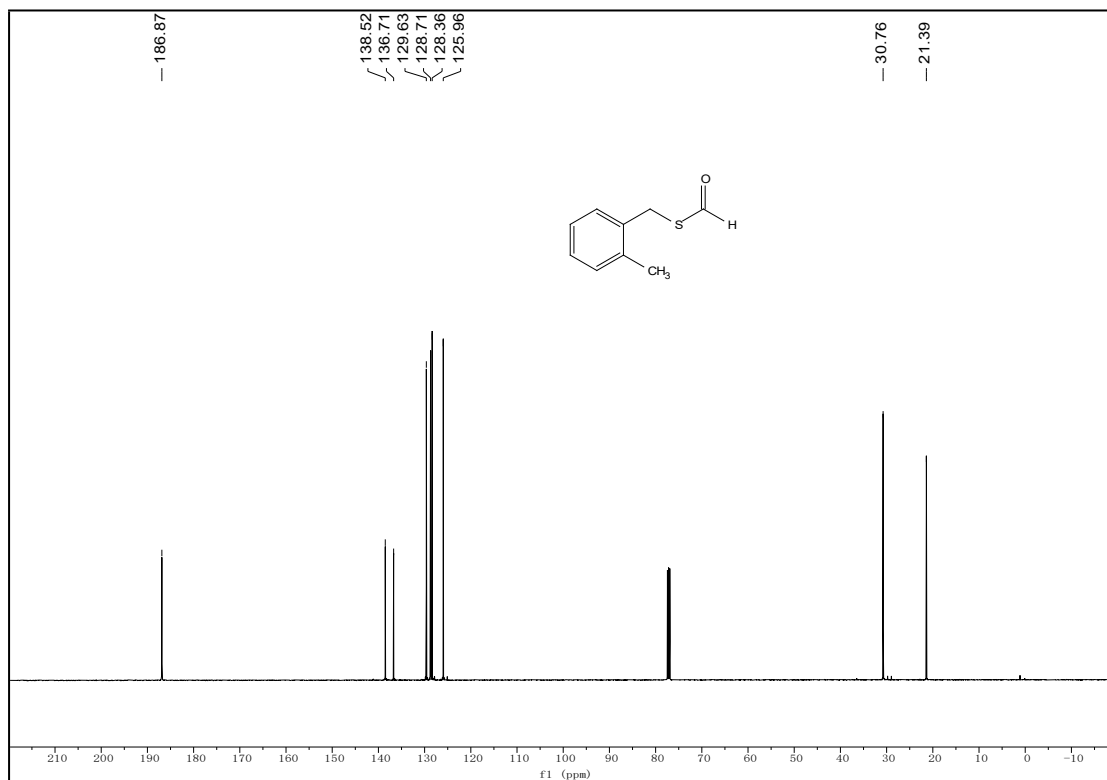

**S-(2-chlorobenzyl) methanethioate (2g)**

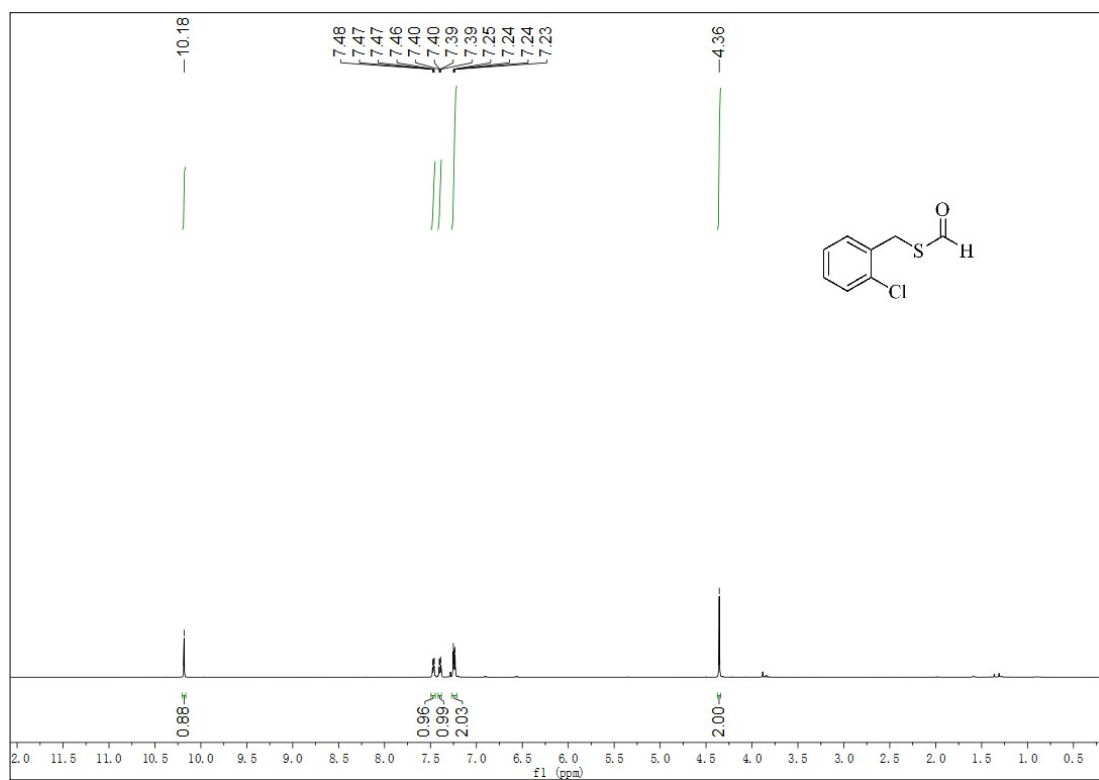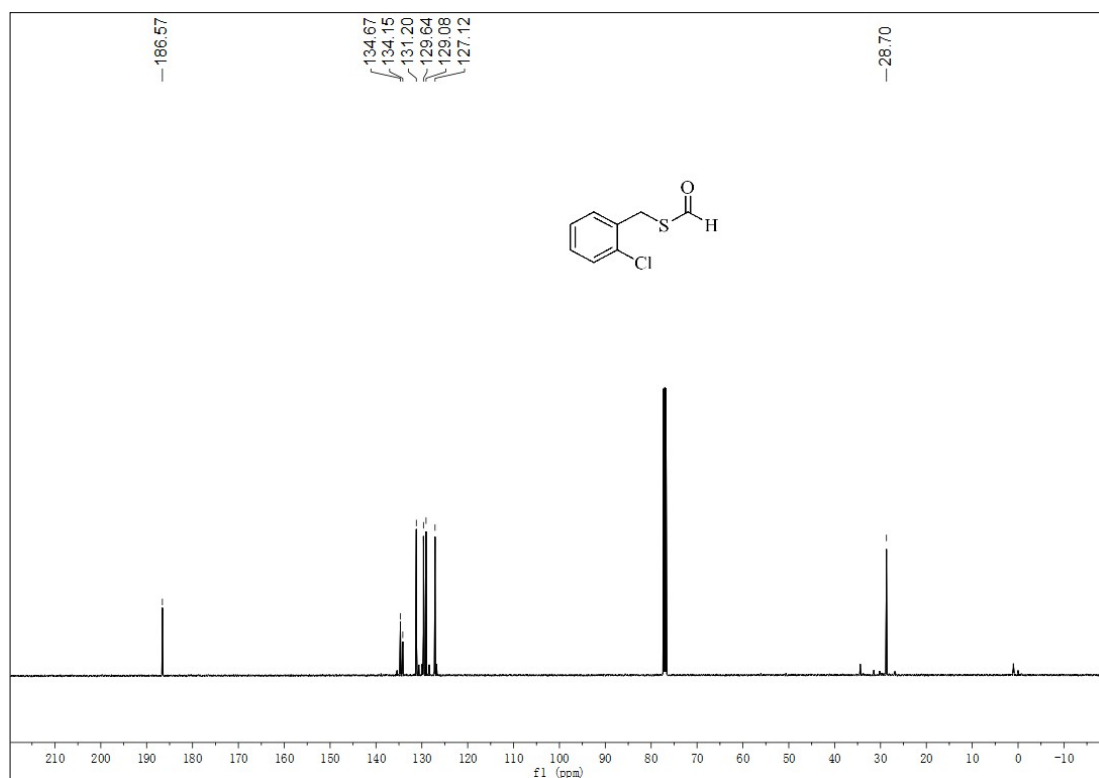

**S-(3-methylbenzyl) methanethioate (2h)**

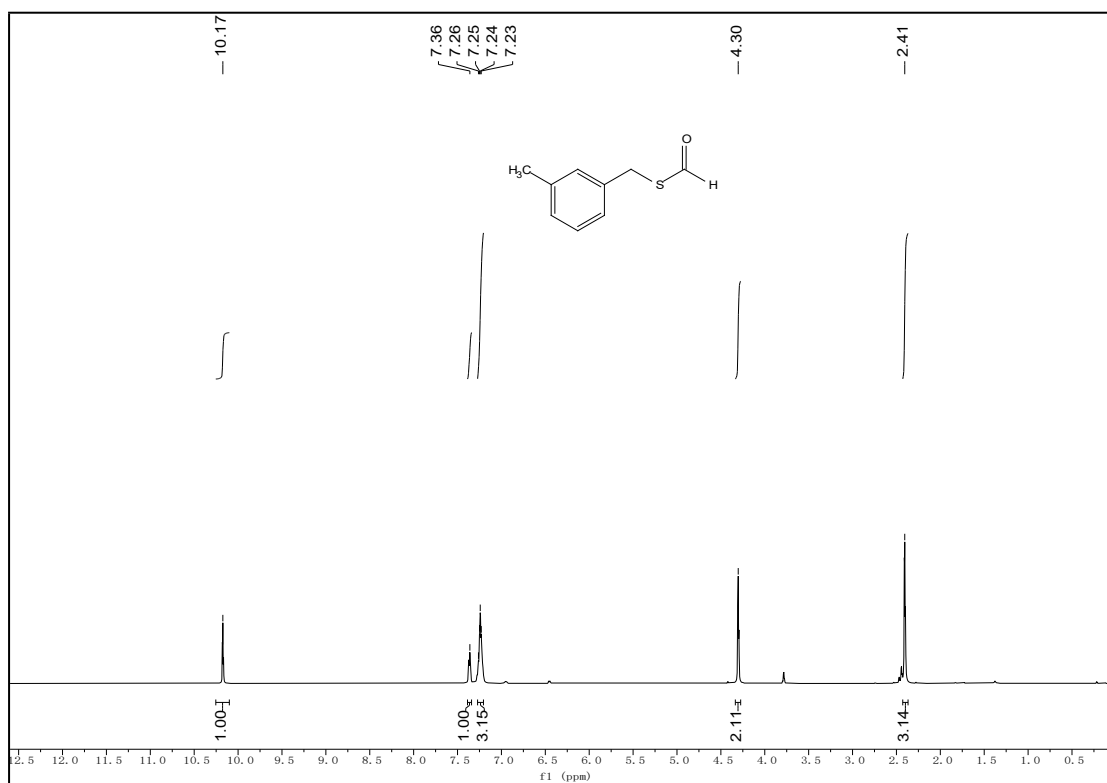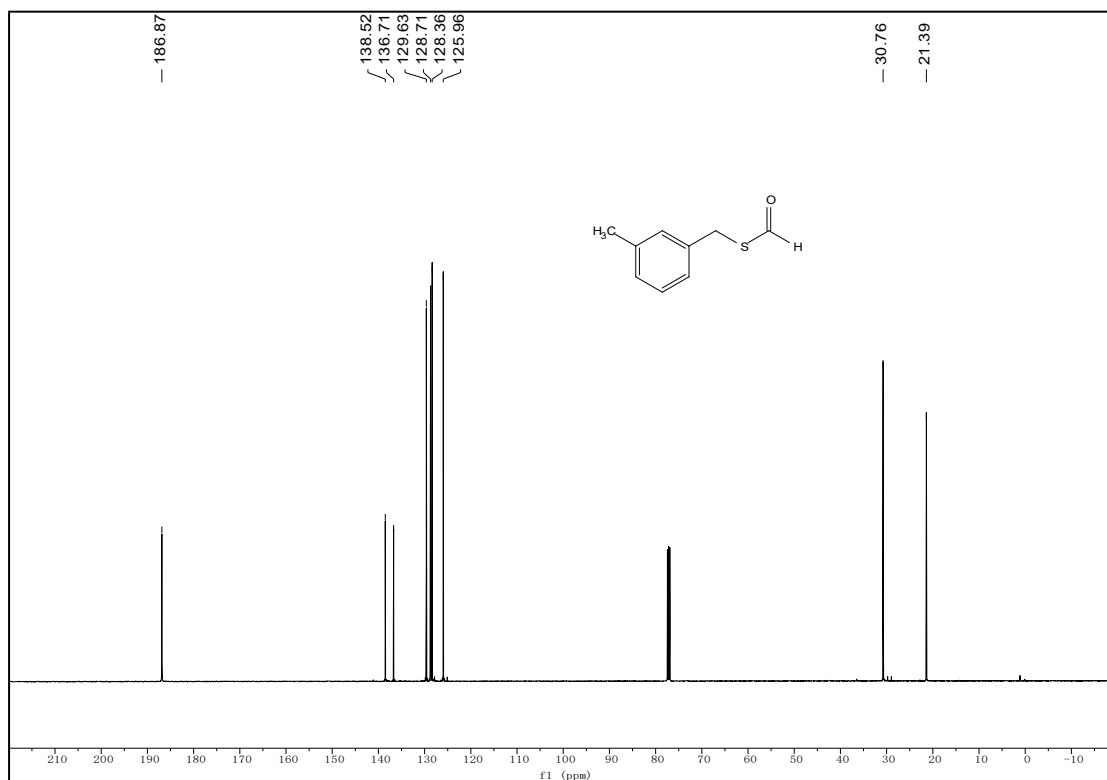

**S-(2,4,6-trimethoxybenzyl) methanethioate (2i)**

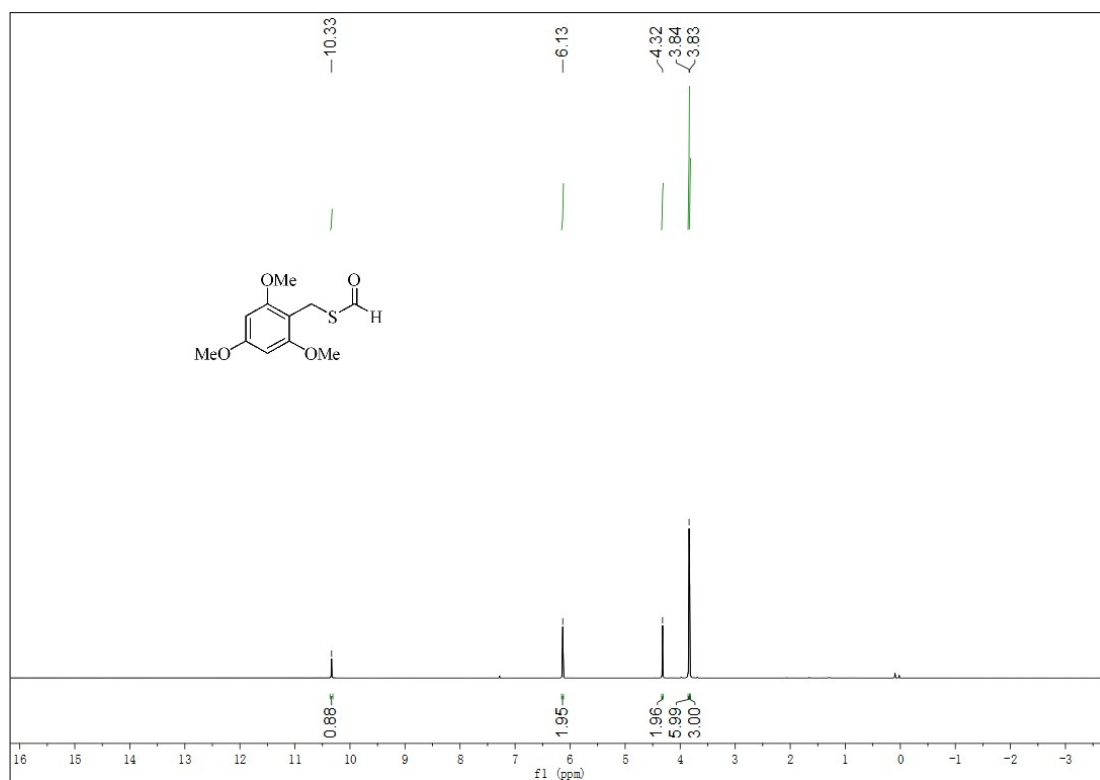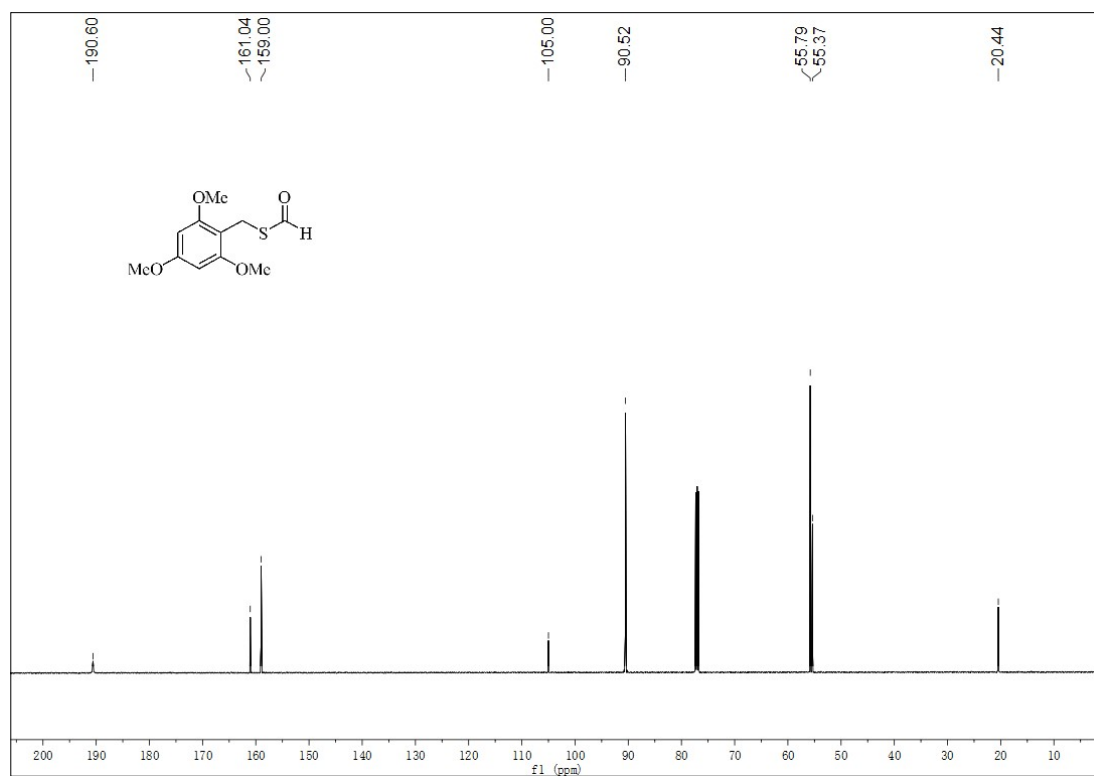

Supplement: d5cc00195a1.pdf [file d5cc00195a1.pdf]
